# Supplementary material for: Downregulation of Peroxidase Activity of Platinum Cube Enables Minute–Time Scale Colorimetric Signaling of Hypoxanthine for Fish Freshness Monitoring
Source: MDPI journal article supplement (doi:10.3390/foods12020291), 2023-01-08
Supplement: s1 [file s1]

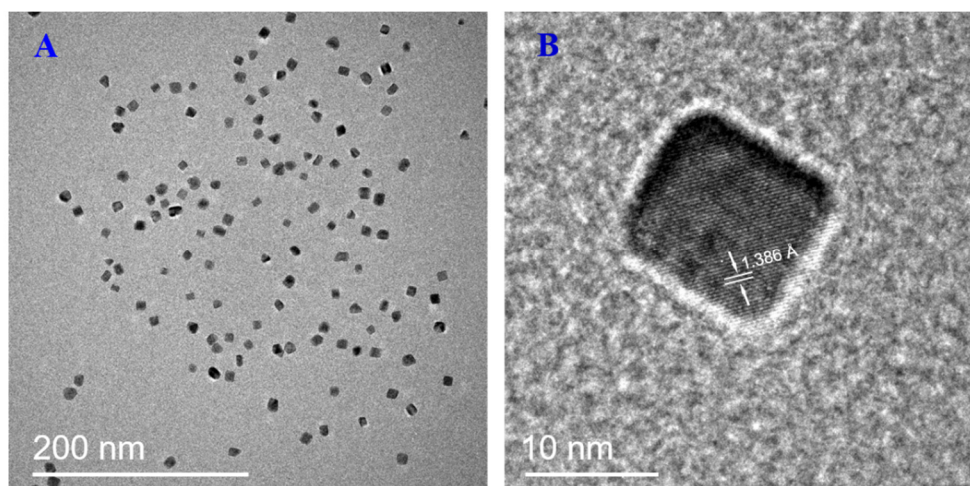

**Figure S1.** (A) TEM image of PVP-PtNCs to show its uniformity and cube shape, (B) Image of single PVP-PtNC taken by a high-resolution TEM

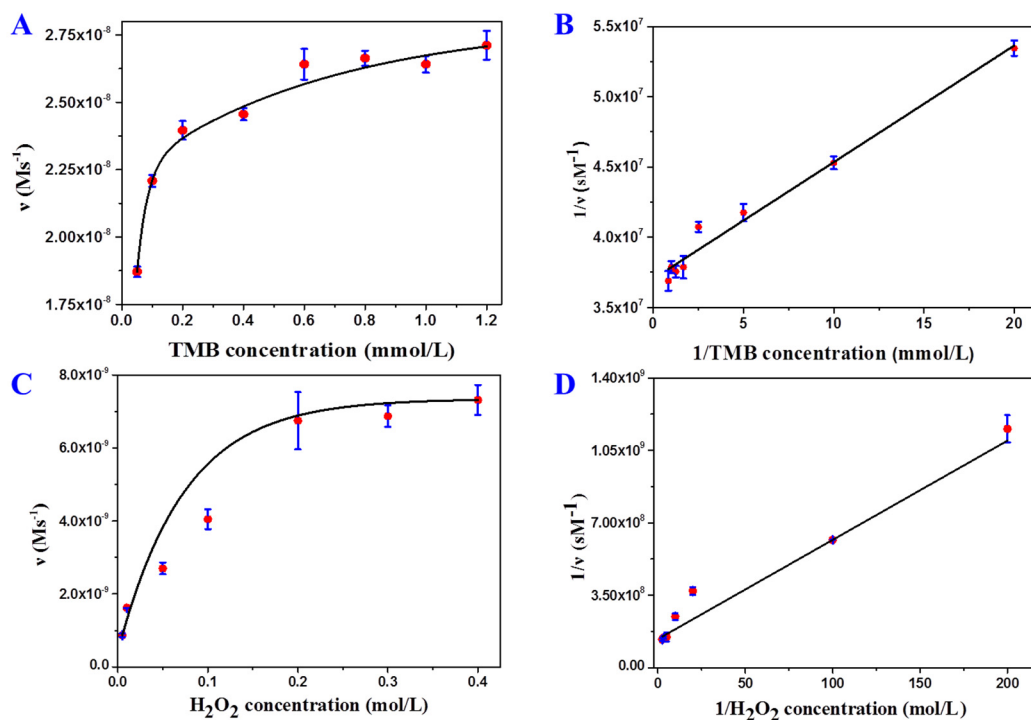

**Figure S2.** The kinetic assays of PVP-PtNC as artificial peroxidase-like catalysts for oxidation of TMB by  $\text{H}_2\text{O}_2$ . (A) Graphic representation of the plots of initial rate ( $v$ ) vs. TMB concentration; (B) double-reciprocal plot generated from (A); (C) Graphic representation of  $v$  vs.  $\text{H}_2\text{O}_2$  concentration; (D) double-reciprocal plot generated from (C)

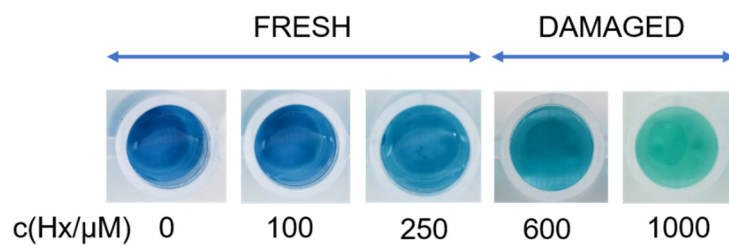

**Figure S3.** The colorimetric images of as-proposed method under different concentrations of Hx.

**Table S1** Comparison of PVP-PtNC kinetic parameters and HRP

| Catalyst | [E] (M) <sup>a</sup>   | Substrate                     | $V_{\max}$ (Ms <sup>-1</sup> ) <sup>b</sup> | $K_m$ (M) <sup>c</sup> | $K_{\text{cat}}$ (s <sup>-1</sup> ) <sup>d</sup> |
|----------|------------------------|-------------------------------|---------------------------------------------|------------------------|--------------------------------------------------|
| PVP-PtNC | $1.67 \times 10^{-11}$ | TMB                           | $1.05 \times 10^{-6}$                       | $2.22 \times 10^{-5}$  | $6.29 \times 10^4$                               |
| PVP-PtNC | $1.67 \times 10^{-11}$ | H <sub>2</sub> O <sub>2</sub> | $3.61 \times 10^{-7}$                       | $3.92 \times 10^{-3}$  | $2.16 \times 10^4$                               |
| HRP[1]   | $2.5 \times 10^{-11}$  | TMB                           | $10.00 \times 10^{-8}$                      | $4.34 \times 10^{-4}$  | $4.00 \times 10^3$                               |
| HRP[1]   | $2.5 \times 10^{-11}$  | H <sub>2</sub> O <sub>2</sub> | $8.71 \times 10^{-8}$                       | $3.70 \times 10^{-3}$  | $3.48 \times 10^3$                               |

<sup>a</sup>[E] is the enzyme (or PVP-PtNC) concentration

<sup>b</sup> $K_m$  is the Michaelis constant

<sup>c</sup> $V_{\max}$  is the maximal reaction velocity

<sup>d</sup> $K_{\text{cat}}$  is the catalytic constant, where  $K_{\text{cat}}=V_{\max}/[E]$ .

**Table S2** Comparison of reported methods with the current one for Hx detection

| Method                | Linear range ( $\mu\text{M}$ ) | LOD ( $\mu\text{M}$ ) | Time (min) | Reference |
|-----------------------|--------------------------------|-----------------------|------------|-----------|
| Fluorescent assay     | 5-120                          | 1.2                   | 15         | [2]       |
| Fluorescent assay     | 8-2500                         | 2.88                  | 60         | [3]       |
| Paper-based device    | 10-700                         | 3.1                   | 30         | [4]       |
| Paper-based device    | 2-10                           | 0.65                  | 30         | [5]       |
| Electrochemical assay | 20-512                         | 9.5                   | >60        | [6]       |
| Electrochemical assay | 5-60                           | 2                     | >60        | [7]       |
| Colorimetric assay    | 0.5-10000                      | 0.16                  | 10         | This work |

## References

1. Gao L, Zhuang J, Nie L, Zhang J, Zhang Y, Gu N, et al. Intrinsic peroxidase-like activity of ferromagnetic nanoparticles. *Nat Nanotechnol.* 2007;2(9):577-83.
2. Zhang Z, Kwok RTK, Yu Y, Tang BZ, Ng KM. Aggregation-induced emission luminogen-based fluorescence detection of hypoxanthine: a probe for biomedical diagnosis of energy metabolism-related conditions. *J Mater Chem B.* 2018;6(28):4575-8.
3. Chen J, Lu Y, Yan F, Wu Y, Huang D, Weng Z. A fluorescent biosensor based on catalytic activity of platinum nanoparticles for freshness evaluation of aquatic products. *Food Chem.* 2020;310:125922.
4. Mustafa F, Andreescu S. Paper-Based Enzyme Biosensor for One-Step Detection of Hypoxanthine in Fresh and Degraded Fish. *ACS Sens.* 2020;5(12):4092-100.
5. Chen P-C, Li Y-C, Ma J-Y, Huang J-Y, Chen C-F, Chang H-T. Size-tunable copper nanocluster aggregates and their application in hydrogen sulfide sensing on paper-based devices. *Sci Rep.* 2016;6(1):1-9.
6. Albelda JAV, Uzunoglu A, Santos GNC, Stanciu LA. Graphene-titanium dioxide nanocomposite based hypoxanthine sensor for assessment of meat freshness. *Biosens Bioelectron.* 2017;89(Pt 1):518-24.
7. Liao L, Xing Y, Xiong X, Gan L, Hu L, Zhao F, et al. An electrochemical biosensor for hypoxanthine detection in vitreous humor: A potential tool for estimating the post-mortem interval in forensic cases. *Microchem J.* 2020;155:104760.
